# Supplementary material for: In-depth behavioral characterization of a rat model of Schaaf-Yang syndrome
Source: Research Square preprint supplement (doi:10.21203/rs.3.rs-7068326/v1), 2025-08-05
Supplement: Supplementary file 1 [file 596c74b8d5d59546cb78eecb.pdf]

# In-depth behavioral characterization of a rat model of Schaaf-Yang syndrome: Supplementary Figures

Felix Franke<sup>1</sup>, Semih Ertürk<sup>1</sup>, Johann G. Maass<sup>1,2</sup>, Dominik Kamionek<sup>1</sup>, Tim Schubert<sup>1,3</sup>, Claudia Pitzer<sup>4</sup>, Susanne Theiß<sup>1</sup>, Christine Fischer<sup>1</sup>, Rachel B. Gilmore<sup>1</sup>, Eva Dwornicki<sup>1</sup>, Colleen R. Bocke<sup>5</sup>, Gina L. C. Yosten<sup>5</sup>, Christian P. Schaaf<sup>1</sup>, Ferdinand Althammer<sup>1\*</sup>

<sup>1</sup> Institute of Human Genetics, Heidelberg University, Heidelberg, Germany

<sup>2</sup> Division of Genetics and Genomics, Boston Children's Hospital, Boston, Massachusetts, United States

<sup>3</sup> Department of Applied Mathematics and Theoretical Physics, Cambridge University, Cambridge, United Kingdom

<sup>4</sup> Interdisciplinary Neurobehavioral Core, Heidelberg University, Heidelberg, Germany

<sup>5</sup> Department of Pharmacology and Physiology, Saint Louis University School of Medicine, Saint Louis, Missouri, United States

\*Corresponding author: Ferdinand Althammer (ferdinand.althammer@med.uni-heidelberg.de)

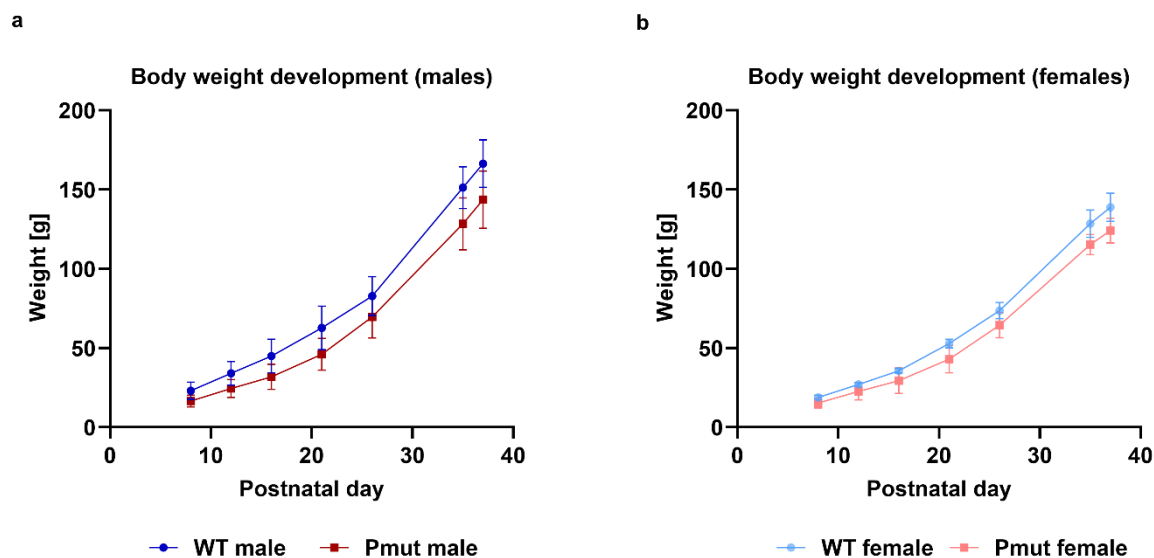

**Supplementary Figure S1. Sex-specific visualization of body weight development in *Mage12<sup>Pmut</sup>* rats and wild-type littermates.** (a) Body weight development in male wild-type and *Mage12<sup>Pmut</sup>* rats. (b) Body weight development in female wild-type and *Mage12<sup>Pmut</sup>* rats. No statistical comparisons were performed within sex groups, as two-way ANOVA revealed no significant genotype-by-sex interaction at any time point; therefore, genotype effects were interpreted across sexes. Statistical details are provided in Supplementary Tables S1, S2.

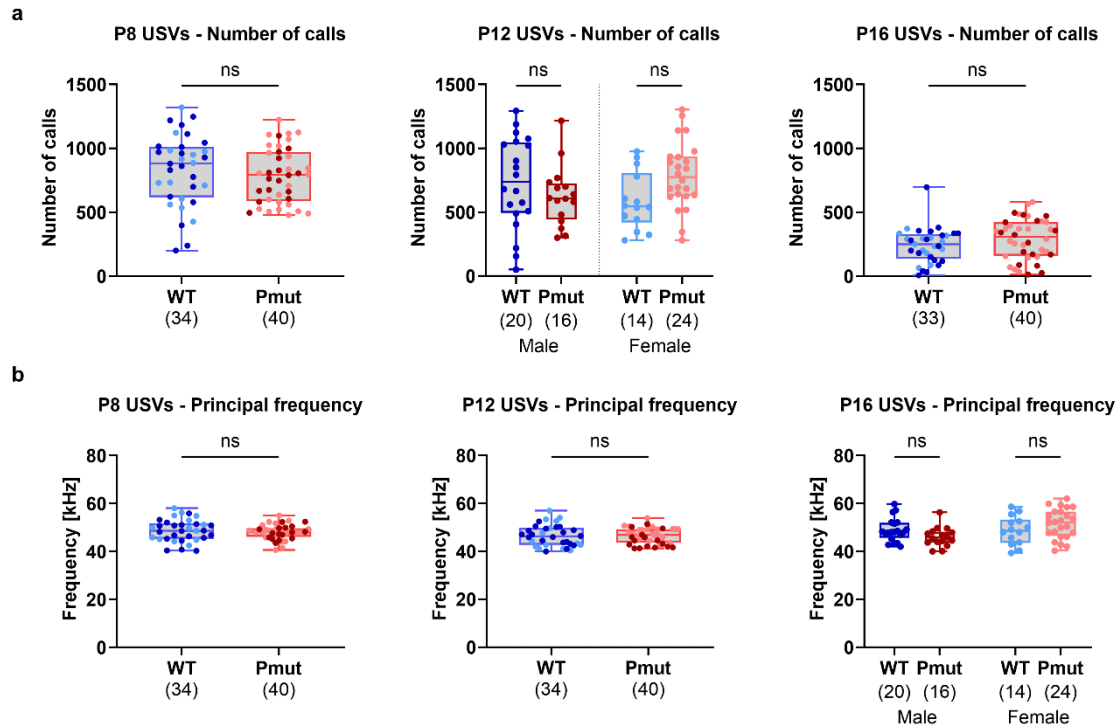

**Supplementary Figure S2. Additional parameters of isolation-induced ultrasonic vocalizations (USVs) in *Magel2*<sup>Pmut</sup> rats compared to wild-type littermates.** (a) No significant genotype effects were observed regarding the number of calls at P8 and P16. At P12, a significant genotype-by-sex interaction was detected, but *post hoc* analyses within each sex did not reveal significant genotype differences. (b) No significant genotype effects were observed for the principal frequency of USVs at P8 and P12. At P16, a significant genotype-by-sex interaction was detected, but *post hoc* analyses within each sex did not reveal significant genotype differences. Sample sizes after exclusion of outliers based on the ROUT method ( $Q = 1\%$ ) are indicated below the graphs. Data points for wild-type animals are shown in blue, and for *Magel2*<sup>Pmut</sup> animals in red. Within each genotype, darker shades represent males, and lighter shades represent females. ns, not significant; two-way ANOVA with genotype and sex as factors, followed by *post hoc* analyses where appropriate. Statistical details are provided in Supplementary Tables S3–S5.

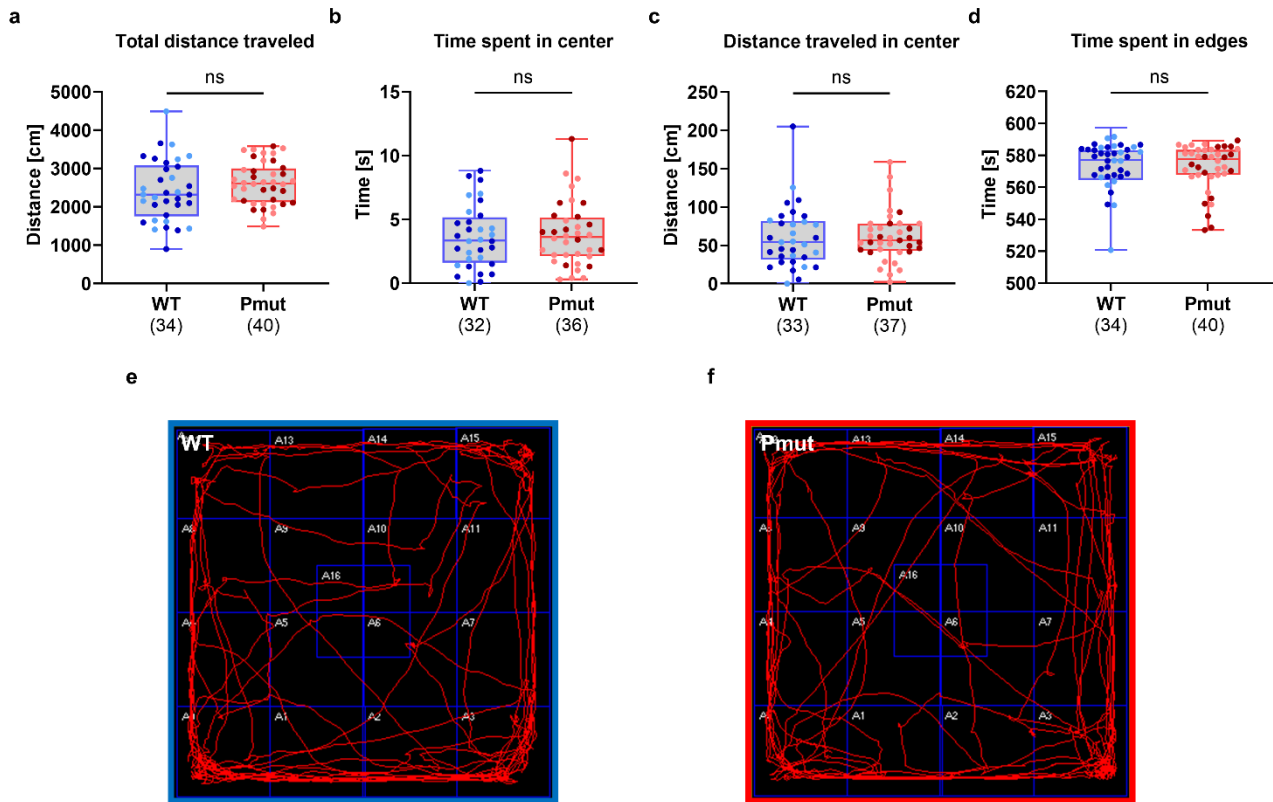

**Supplementary Figure S3. Spontaneous locomotion and anxiety-like behavior measured by the open field test in *Magel2*<sup>Pmut</sup> rats compared to wild-type littermates.** (a–d) No significant genotype effects were observed for any of the open field parameters analyzed, including total distance traveled, time spent in center, distance traveled in center, and time spent in edges. Sample sizes after exclusion of outliers based on the ROUT method ( $Q = 1\%$ ) are indicated below the graphs. Data points for wild-type animals are shown in blue, and for *Magel2*<sup>Pmut</sup> animals in red. Within each genotype, darker shades represent males, and lighter shades represent females. ns, not significant; two-way ANOVA with genotype and sex as factors. Statistical details are provided in Supplementary Tables S8, S9. (e–f) Representative examples of track maps in the open field for wild-type and *Magel2*<sup>Pmut</sup> animals. No apparent differences are observed.

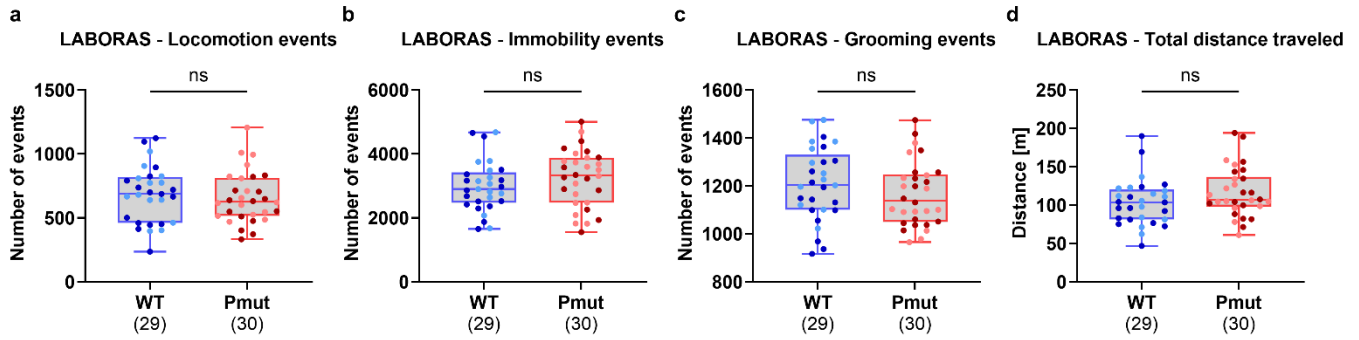

**Supplementary Figure S4. Additional parameters of home-cage monitoring using the LABORAS system in *Mage12<sup>Pmut</sup>* rats compared to wild-type littermates.** (a–c) No significant genotype effects were observed for the number of locomotion events, immobility events, or grooming events. Sample sizes after exclusion of outliers based on the ROUT method ( $Q = 1\%$ ) are indicated below the graphs. Data points for wild-type animals are shown in blue, and for *Mage12<sup>Pmut</sup>* animals in red. Within each genotype, darker shades represent males, and lighter shades represent females. ns, not significant; two-way ANOVA with genotype and sex as factors. Statistical details are provided in Supplementary Tables S10, S11.

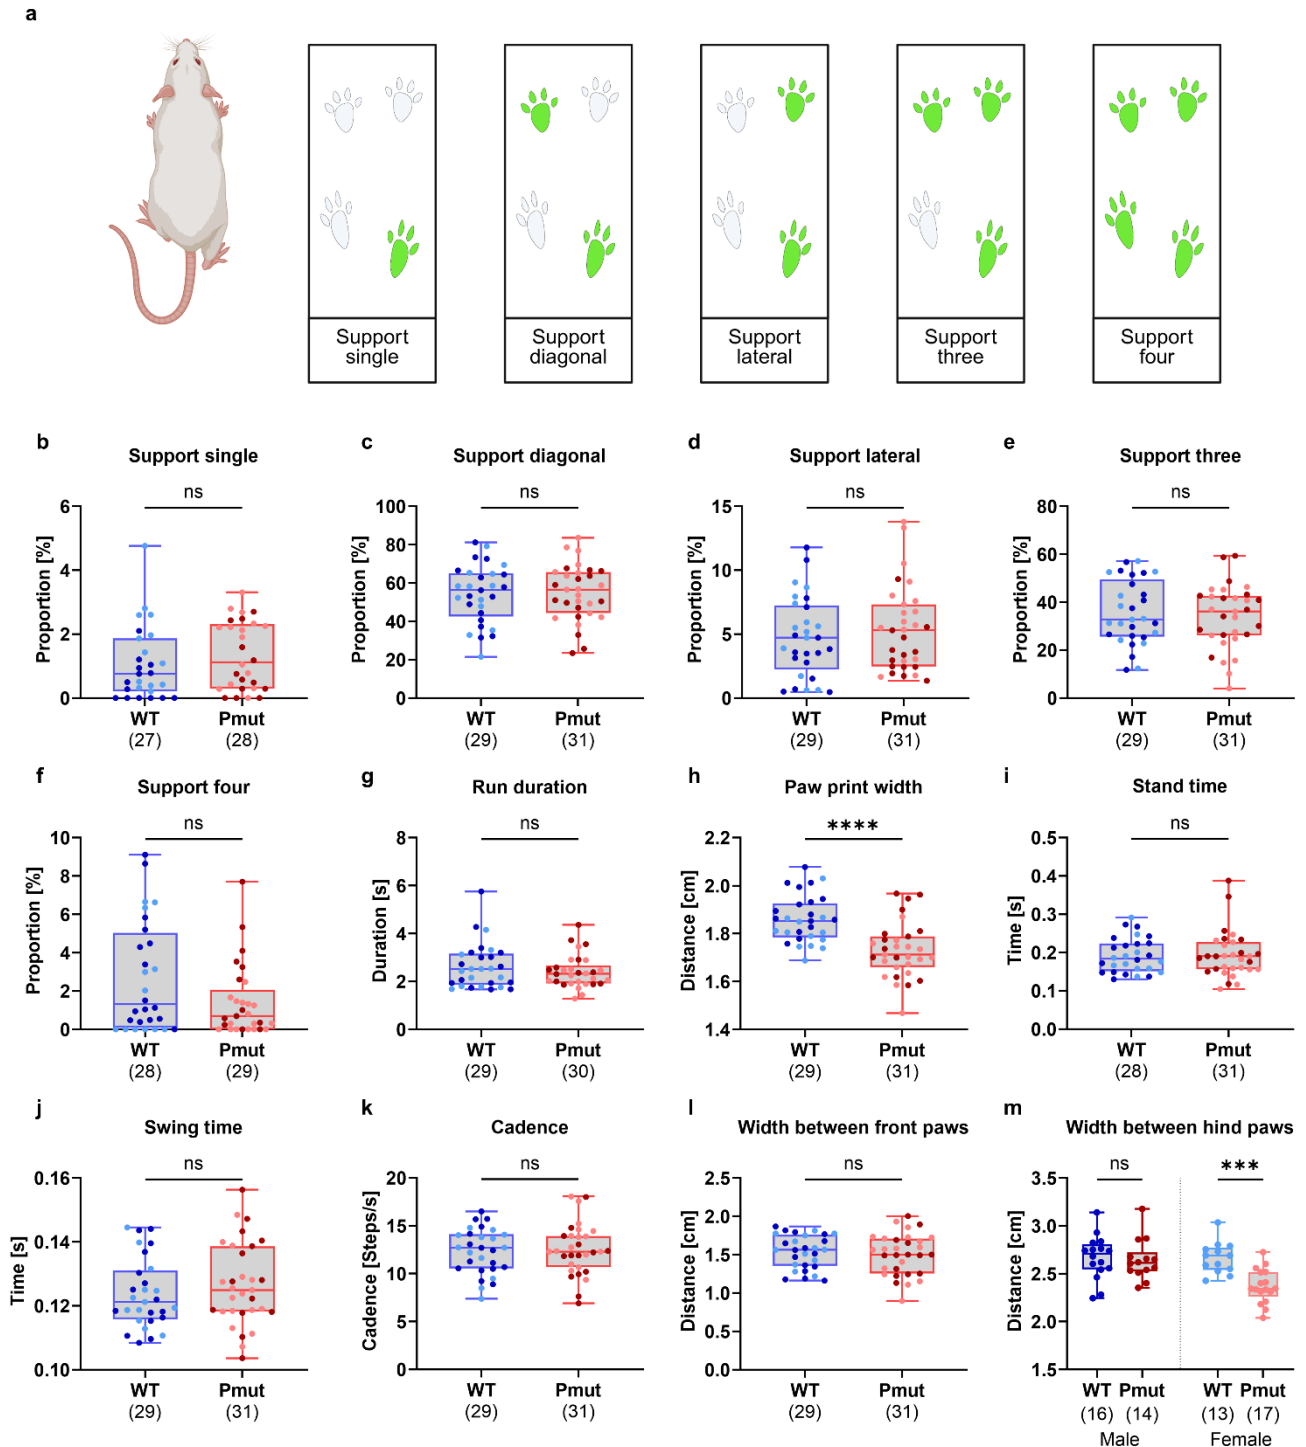

**Supplementary Figure S5. Additional parameters of CatWalk XT gait analysis in *Magel2*<sup>Pmut</sup> rats compared to wild-type littermates.** (a) Illustration of analyzed support parameters. (b–f) No significant genotype effects were observed for any of the support parameters analyzed. (g) Run duration was comparable between genotypes. (h) Paw print width was significantly reduced in *Magel2*<sup>Pmut</sup> rats compared to wild-type littermates. (i–l) No significant genotype effects were observed for stand time, swing time, cadence, and width between front paws. (m) Width between hind paws was significantly reduced in female *Magel2*<sup>Pmut</sup> rats but not in males compared to the respective wild-type control group. Sample sizes after exclusion of outliers based on the ROUT method (Q = 1%) are indicated below the graphs. Data points for wild-type animals are shown in blue, and for *Magel2*<sup>Pmut</sup> animals in red.

Within each genotype, darker shades represent males, and lighter shades represent females. \*\*\* $P < 0.001$ , \*\*\*\* $P < 0.0001$ ; ns: not significant; two-way ANOVA with genotype and sex as factors, followed by *post hoc* analyses where appropriate. Statistical details are provided in Supplementary Tables S12–S14.

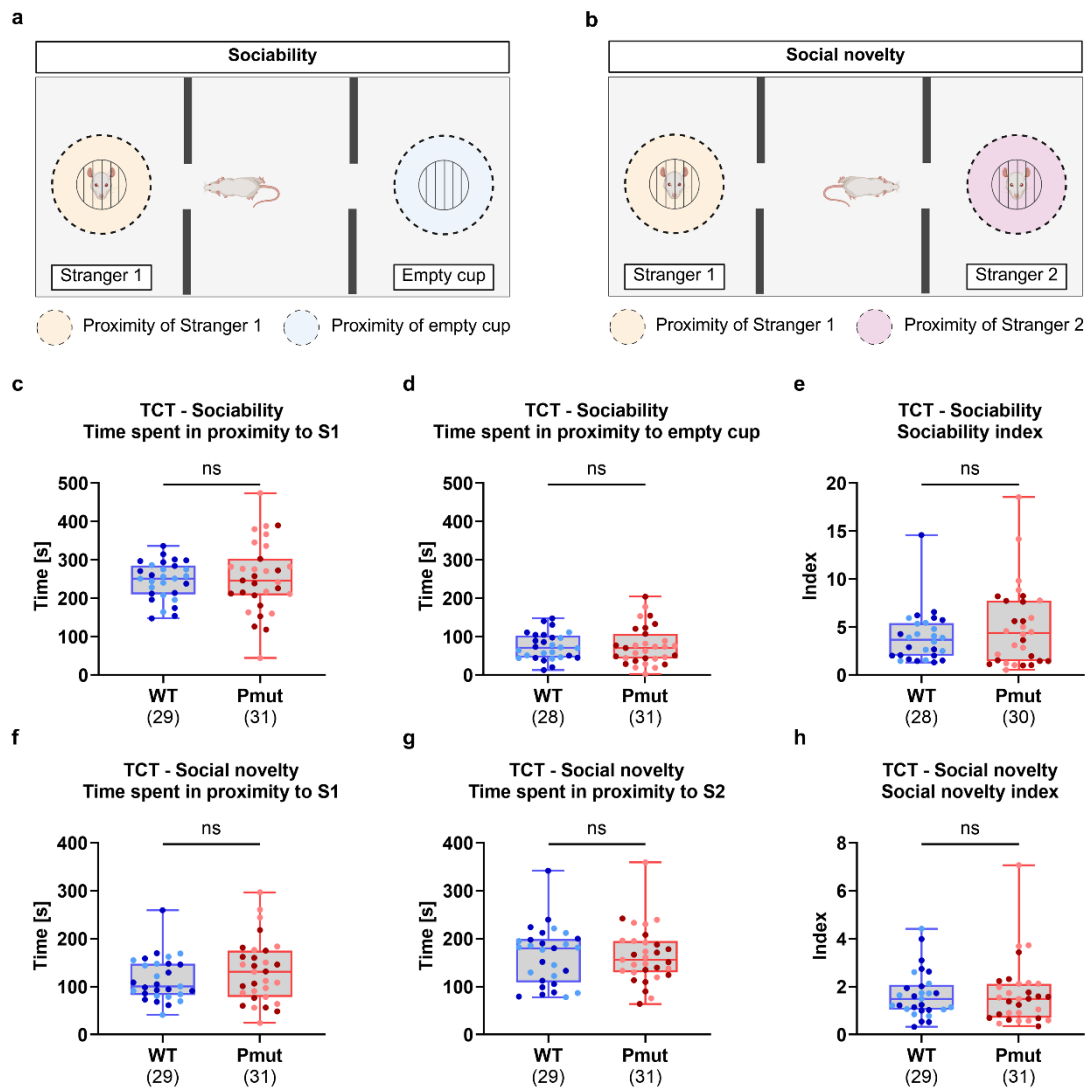

**Supplementary Figure S6. Sociability and social novelty as measured by the three-chamber social interaction test in *Magel2<sup>Pmut</sup>* rats compared to wild-type littermates. (a–b) Schematic illustrations of the two analyzed trials. In the sociability trial, rats typically prefer to spend time in proximity to the unfamiliar Stranger 1 (S1) instead of the empty cup. In the social novelty trial, rats typically prefer to spend time in proximity to the unfamiliar Stranger 2 (S2) instead of the familiar Stranger 1 (S1). (c–h) No significant genotype effects were observed for any of the analyzed parameters, including the respective time spent in proximity to each pencil cup and the sociability and social novelty indices. Sample sizes after exclusion of outliers based on the ROUT method ( $Q = 1\%$ ) are indicated below the graphs. Data points for wild-type animals are shown in blue, and for *Magel2<sup>Pmut</sup>* animals in red. Within each genotype, darker shades represent males, and lighter shades represent females. ns, not significant; two-way ANOVA with genotype and sex as factors. Statistical details are provided in Supplementary Tables S17, S18.**

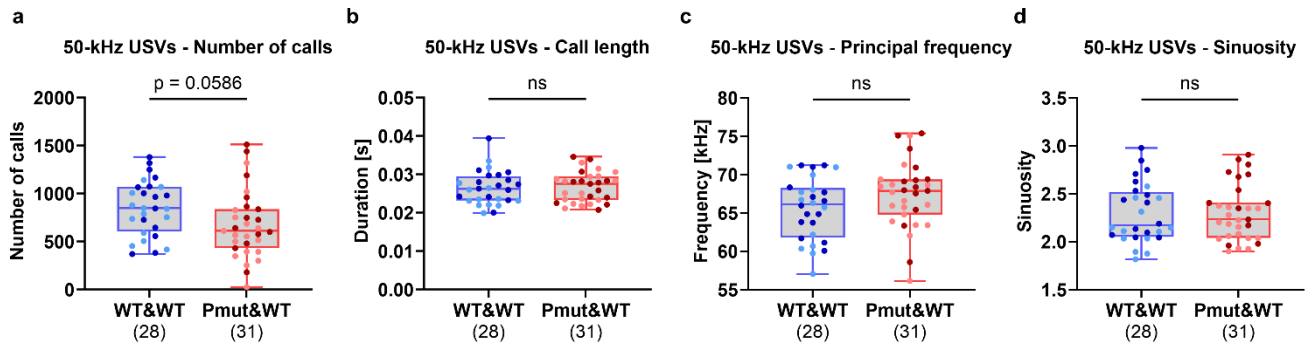

**Supplementary Figure S7. 50-kHz ultrasonic vocalizations (USVs) emitted during social interaction in pairings of *Magel2*<sup>Pmut</sup> rats and wild-type stimulus rats compared to pairings of wild-type littermates and wild-type stimulus rats. (a–d)** No significant genotype effects were observed for any of the analyzed parameters, including the number of calls, call length, principal frequency, and sinuosity. A trend toward a reduction in the number of calls in pairings including *Magel2*<sup>Pmut</sup> rats was observed. Sample sizes after exclusion of outliers based on the ROUT method ( $Q = 1\%$ ) are indicated below the graphs. Data points for pairings of wild-type littermates and wild-type stimulus rats are shown in blue, and for pairings of *Magel2*<sup>Pmut</sup> rats and wild-type stimulus rats in red. Within each pairing, darker shades represent males, and lighter shades represent females. ns, not significant; two-way ANOVA with genotype and sex as factors. Statistical details are provided in Supplementary Tables S22, S23.

# In-depth behavioral characterization of a rat model of Schaaf-Yang syndrome: Supplementary Tables

Felix Franke<sup>1</sup>, Semih Ertürk<sup>1</sup>, Johann G. Maass<sup>1,2</sup>, Dominik Kamionek<sup>1</sup>, Tim Schubert<sup>1,3</sup>, Claudia Pitzer<sup>4</sup>, Susanne Theiß<sup>1</sup>, Christine Fischer<sup>1</sup>, Rachel B. Gilmore<sup>1</sup>, Eva Dwornicki<sup>1</sup>, Colleen R. Bocke<sup>5</sup>, Gina L. C. Yosten<sup>5</sup>, Christian P. Schaaf<sup>1</sup>, Ferdinand Althammer<sup>1\*</sup>

<sup>1</sup> Institute of Human Genetics, Heidelberg University, Heidelberg, Germany

<sup>2</sup> Division of Genetics and Genomics, Boston Children's Hospital, Boston, Massachusetts, United States

<sup>3</sup> Department of Applied Mathematics and Theoretical Physics, Cambridge University, Cambridge, United Kingdom

<sup>4</sup> Interdisciplinary Neurobehavioral Core, Heidelberg University, Heidelberg, Germany

<sup>5</sup> Department of Pharmacology and Physiology, Saint Louis University School of Medicine, Saint Louis, Missouri, United States

\*Corresponding author: Ferdinand Althammer (ferdinand.althammer@med.uni-heidelberg.de)

| Figure  | Parameter  | Sample size before outlier analysis |           |           |             | Outliers removed (ROUT, Q = 1%) | Sample size after outlier analysis |           |           |             |
|---------|------------|-------------------------------------|-----------|-----------|-------------|---------------------------------|------------------------------------|-----------|-----------|-------------|
|         |            | WT male                             | WT female | Pmut male | Pmut female |                                 | WT male                            | WT female | Pmut male | Pmut female |
| Fig. 1c | P8 Weight  | 14                                  | 10        | 10        | 14          | 1                               | 14                                 | 9         | 10        | 14          |
| Fig. 1c | P12 Weight | 14                                  | 10        | 10        | 14          | 1                               | 14                                 | 9         | 10        | 14          |
| Fig. 1c | P16 Weight | 14                                  | 10        | 10        | 14          | 1                               | 14                                 | 9         | 10        | 14          |
| Fig. 1c | P21 Weight | 20                                  | 14        | 16        | 24          | 1                               | 20                                 | 13        | 16        | 24          |
| Fig. 1c | P26 Weight | 20                                  | 14        | 16        | 24          | 4                               | 18                                 | 13        | 16        | 23          |
| Fig. 1c | P35 Weight | 16                                  | 13        | 14        | 17          | 1                               | 16                                 | 13        | 14        | 16          |
| Fig. 1c | P37 Weight | 16                                  | 9         | 14        | 15          | 0                               | 16                                 | 9         | 14        | 15          |

**Supplementary Table S1.** Sample size before and after outlier analysis (ROUT, Q = 1%) for body weight assessment in *Magel2*<sup>Pmut</sup> rats and wild-type controls of both sexes. Note: Weight was only assessed directly after behavioral testing, before LABORAS, or at weaning to avoid additionally disrupting animals during resting periods between tests. Sample sizes vary due to the following reasons: (1) Weight after measuring USVs at P8, P12, and P16 was not initially measured in the first two litters and was later added as an additional outcome to analyze weight differences before weaning. (2) Animal numbers were reduced after P26 due to capacity limits (e.g., LABORAS system availability, feasibility of long behavioral protocols like the three-chamber test). Animal selection for further testing was done by an unbiased person who was only aware of genotypes and cage distributions. This ensured a balanced genotype distribution while maintaining practical feasibility in reducing sample size. The experimenter remained blind to the genotypes. (3) The Spontaneous Alternation T-Maze was performed on P37-38. Animals tested and weighed on P38 were excluded from weight analysis in this case. Especially considering the robust genotype effects observed across all time points, we have no reason to believe that the varying sample sizes introduced any bias into the results.

| Figure  | Parameter  | Statistical test | Source of variation | P Value               | F (DFn, DFd)       |
|---------|------------|------------------|---------------------|-----------------------|--------------------|
| Fig. 1c | P8 Weight  | two-way ANOVA    | Genotype            | <b>&lt;0.0001****</b> | F (1, 43) = 18.92  |
|         |            |                  | Sex                 | <b>0.0180*</b>        | F (1, 43) = 6.055  |
|         |            |                  | Genotype x sex      | 0.1931                | F (1, 43) = 1.748  |
| Fig. 1c | P12 Weight | two-way ANOVA    | Genotype            | <b>0.0002***</b>      | F (1, 43) = 16.690 |
|         |            |                  | Sex                 | <b>0.0120*</b>        | F (1, 43) = 6.887  |
|         |            |                  | Genotype x sex      | 0.1331                | F (1, 43) = 2.343  |
| Fig. 1c | P16 Weight | two-way ANOVA    | Genotype            | <b>0.0003***</b>      | F (1, 43) = 15.810 |
|         |            |                  | Sex                 | <b>0.0193*</b>        | F (1, 43) = 5.906  |
|         |            |                  | Genotype x sex      | 0.1616                | F (1, 43) = 2.028  |
| Fig. 1c | P21 Weight | two-way ANOVA    | Genotype            | <b>&lt;0.0001****</b> | F (1, 69) = 30.730 |
|         |            |                  | Sex                 | <b>0.0085**</b>       | F (1, 69) = 7.346  |
|         |            |                  | Genotype x sex      | 0.1656                | F (1, 69) = 1.936  |
| Fig. 1c | P26 Weight | two-way ANOVA    | Genotype            | <b>&lt;0.0001****</b> | F (1, 66) = 19.670 |
|         |            |                  | Sex                 | <b>0.0061**</b>       | F (1, 66) = 8.024  |
|         |            |                  | Genotype x sex      | 0.4327                | F (1, 66) = 0.6232 |
| Fig. 1c | P35 Weight | two-way ANOVA    | Genotype            | <b>&lt;0.0001****</b> | F (1, 55) = 34.960 |
|         |            |                  | Sex                 | <b>&lt;0.0001****</b> | F (1, 55) = 34.060 |
|         |            |                  | Genotype x sex      | 0.1238                | F (1, 55) = 2.443  |
| Fig. 1c | P37 Weight | two-way ANOVA    | Genotype            | <b>&lt;0.0001****</b> | F (1, 50) = 24.630 |
|         |            |                  | Sex                 | <b>&lt;0.0001****</b> | F (1, 50) = 38.730 |
|         |            |                  | Genotype x sex      | 0.2881                | F (1, 50) = 1.153  |

**Supplementary Table S2.** Statistical comparisons of body weight at different time points for effects of genotype, sex, and genotype-by-sex interaction in *Mage12<sup>Pmut</sup>* rats and wild-type controls (two-way ANOVA).

| Figure  | Parameter                   | Sample size before outlier analysis |           |           |             | Outliers removed<br>(ROUT, Q = 1%) | Sample size after outlier analysis |           |           |             |
|---------|-----------------------------|-------------------------------------|-----------|-----------|-------------|------------------------------------|------------------------------------|-----------|-----------|-------------|
|         |                             | WT male                             | WT female | Pmut male | Pmut female |                                    | WT male                            | WT female | Pmut male | Pmut female |
| Fig. 2a | P8 USVs<br>Call length      | 20                                  | 14        | 16        | 24          | 1                                  | 20                                 | 14        | 15        | 24          |
| Fig. 2a | P12 USVs<br>Call length     | 20                                  | 14        | 16        | 24          | 0                                  | 20                                 | 14        | 16        | 24          |
| Fig. 2a | P16 USVs<br>Call length     | 20                                  | 14        | 16        | 24          | 1                                  | 20                                 | 14        | 15        | 24          |
| Fig. 2c | P8 USVs<br>Sinuosity        | 20                                  | 14        | 16        | 24          | 1                                  | 19                                 | 14        | 16        | 24          |
| Fig. 2c | P12 USVs<br>Sinuosity       | 20                                  | 14        | 16        | 24          | 1                                  | 20                                 | 14        | 16        | 23          |
| Fig. 2c | P16 USVs<br>Sinuosity       | 20                                  | 14        | 16        | 24          | 0                                  | 20                                 | 14        | 16        | 24          |
| Fig. 2d | P8 USVs<br>Power            | 20                                  | 14        | 16        | 24          | 0                                  | 20                                 | 14        | 16        | 24          |
| Fig. 2d | P12 USVs<br>Power           | 20                                  | 14        | 16        | 24          | 1                                  | 19                                 | 14        | 16        | 24          |
| Fig. 2d | P16 USVs<br>Power           | 20                                  | 14        | 16        | 24          | 0                                  | 20                                 | 14        | 16        | 24          |
| Fig. S2 | P8 USVs<br>Number of calls  | 20                                  | 14        | 16        | 24          | 0                                  | 20                                 | 14        | 16        | 24          |
| Fig. S2 | P12 USVs<br>Number of calls | 20                                  | 14        | 16        | 24          | 0                                  | 20                                 | 14        | 16        | 24          |
| Fig. S2 | P16 USVs<br>Number of calls | 20                                  | 14        | 16        | 24          | 1                                  | 19                                 | 14        | 16        | 24          |
| Fig. S2 | P8 USVs<br>Prin. frequency  | 20                                  | 14        | 16        | 24          | 0                                  | 20                                 | 14        | 16        | 24          |
| Fig. S2 | P12 USVs<br>Prin. frequency | 20                                  | 14        | 16        | 24          | 0                                  | 20                                 | 14        | 16        | 24          |
| Fig. S2 | P16 USVs<br>Prin. frequency | 20                                  | 14        | 16        | 24          | 0                                  | 20                                 | 14        | 16        | 24          |

**Supplementary Table S3.** Sample size before and after outlier analysis (ROUT, Q = 1%) for isolation-induced ultrasonic vocalization (USV) parameters in *Mage12*<sup>Pmut</sup> rats and wild-type controls of both sexes.

| Figure  | Parameter                   | Statistical test | Source of variation | P Value          | F (DFn, DFd)         |
|---------|-----------------------------|------------------|---------------------|------------------|----------------------|
| Fig. 2a | P8 USVs<br>Call length      | two-way ANOVA    | Genotype            | <b>0.0001***</b> | F (1, 69) = 17.00    |
|         |                             |                  | Sex                 | <b>0.0132*</b>   | F (1, 69) = 6.468    |
|         |                             |                  | Genotype x sex      | 0.3186           | F (1, 69) = 1.009    |
| Fig. 2a | P12 USVs<br>Call length     | two-way ANOVA    | Genotype            | <b>0.0298*</b>   | F (1, 70) = 4.922    |
|         |                             |                  | Sex                 | 0.1596           | F (1, 70) = 2.021    |
|         |                             |                  | Genotype x sex      | <b>0.0030**</b>  | F (1, 70) = 9.435    |
| Fig. 2a | P16 USVs<br>Call length     | two-way ANOVA    | Genotype            | 0.7252           | F (1, 69) = 0.1246   |
|         |                             |                  | Sex                 | 0.0622           | F (1, 69) = 3.592    |
|         |                             |                  | Genotype x sex      | <b>0.0041**</b>  | F (1, 69) = 8.807    |
| Fig. 2c | P8 USVs<br>Sinuosity        | two-way ANOVA    | Genotype            | 0.9216           | F (1, 69) = 0.009748 |
|         |                             |                  | Sex                 | 0.2279           | F (1, 69) = 1.480    |
|         |                             |                  | Genotype x sex      | 0.4139           | F (1, 69) = 0.6757   |
| Fig. 2c | P12 USVs<br>Sinuosity       | two-way ANOVA    | Genotype            | 0.7504           | F (1, 69) = 0.1020   |
|         |                             |                  | Sex                 | 0.1603           | F (1, 69) = 2.015    |
|         |                             |                  | Genotype x sex      | <b>0.0010***</b> | F (1, 69) = 11.88    |
| Fig. 2c | P16 USVs<br>Sinuosity       | two-way ANOVA    | Genotype            | 0.0832           | F (1, 70) = 3.089    |
|         |                             |                  | Sex                 | 0.2045           | F (1, 70) = 1.641    |
|         |                             |                  | Genotype x sex      | 0.0698           | F (1, 70) = 3.390    |
| Fig. 2d | P8 USVs<br>Power            | two-way ANOVA    | Genotype            | 0.1244           | F (1, 70) = 0.1244   |
|         |                             |                  | Sex                 | 0.1738           | F (1, 70) = 0.1738   |
|         |                             |                  | Genotype x sex      | 0.6507           | F (1, 70) = 0.6507   |
| Fig. 2d | P12 USVs<br>Power           | two-way ANOVA    | Genotype            | <b>0.0107*</b>   | F (1, 69) = 6.893    |
|         |                             |                  | Sex                 | <b>0.0320*</b>   | F (1, 69) = 4.793    |
|         |                             |                  | Genotype x sex      | 0.3254           | F (1, 69) = 0.9812   |
| Fig. 2d | P16 USVs<br>Power           | two-way ANOVA    | Genotype            | 0.7109           | F (1, 70) = 0.1385   |
|         |                             |                  | Sex                 | 0.7724           | F (1, 70) = 0.08430  |
|         |                             |                  | Genotype x sex      | 0.2225           | F (1, 70) = 1.515    |
| Fig. S2 | P8 USVs<br>Number of calls  | two-way ANOVA    | Genotype            | 0.4533           | F (1, 70) = 0.5687   |
|         |                             |                  | Sex                 | 0.9595           | F (1, 70) = 0.002598 |
|         |                             |                  | Genotype x sex      | 0.7667           | F (1, 70) = 0.08869  |
| Fig. S2 | P12 USVs<br>Number of calls | two-way ANOVA    | Genotype            | 0.4827           | F (1, 70) = 0.4980   |
|         |                             |                  | Sex                 | 0.8650           | F (1, 70) = 0.02912  |
|         |                             |                  | Genotype x sex      | <b>0.0236*</b>   | F (1, 70) = 5.354    |
| Fig. S2 | P16 USVs<br>Number of calls | two-way ANOVA    | Genotype            | 0.2081           | F (1, 69) = 1.614    |
|         |                             |                  | Sex                 | 0.5979           | F (1, 69) = 0.2807   |
|         |                             |                  | Genotype x sex      | 0.7148           | F (1, 69) = 0.1346   |
| Fig. S2 | P8 USVs<br>Prin. frequency  | two-way ANOVA    | Genotype            | 0.3316           | F (1, 70) = 0.9557   |
|         |                             |                  | Sex                 | 0.2201           | F (1, 70) = 1.531    |
|         |                             |                  | Genotype x sex      | 0.3321           | F (1, 70) = 0.9539   |
| Fig. S2 | P12 USVs<br>Prin. frequency | two-way ANOVA    | Genotype            | 0.7190           | F (1, 70) = 0.1305   |
|         |                             |                  | Sex                 | 0.0824           | F (1, 70) = 3.105    |
|         |                             |                  | Genotype x sex      | 0.1000           | F (1, 70) = 2.779    |
| Fig. S2 | P16 USVs<br>Prin. frequency | two-way ANOVA    | Genotype            | 0.9676           | F (1, 70) = 0.001664 |
|         |                             |                  | Sex                 | <b>0.0399*</b>   | F (1, 70) = 4.383    |
|         |                             |                  | Genotype x sex      | <b>0.0304*</b>   | F (1, 70) = 4,880    |

**Supplementary Table S4.** Statistical comparisons of isolation-induced ultrasonic vocalization (USV) parameters for effects of genotype, sex, and genotype-by-sex interaction in *Mage12<sup>Pmut</sup>* rats and wild-type controls (two-way ANOVA).

| Figure  | Parameter                   | Statistical test                                     | Comparison           | Adjusted P Value | t      |
|---------|-----------------------------|------------------------------------------------------|----------------------|------------------|--------|
| Fig. 2a | P12 USVs<br>Call length     | <i>post hoc</i> t-test with<br>Bonferroni correction | WT vs. Pmut – Male   | <b>0.0007***</b> | 3.746  |
|         |                             |                                                      | WT vs. Pmut – Female | >0.9999          | 0.6024 |
| Fig. 2a | P16 USVs<br>Call length     | <i>post hoc</i> t-test with<br>Bonferroni correction | WT vs. Pmut – Male   | <b>0.0455*</b>   | 2.330  |
|         |                             |                                                      | WT vs. Pmut – Female | 0.1333           | 1.863  |
| Fig. 2c | P12 USVs<br>Sinuosity       | <i>post hoc</i> t-test with<br>Bonferroni correction | WT vs. Pmut – Male   | <b>0.0185*</b>   | 2.677  |
|         |                             |                                                      | WT vs. Pmut – Female | 0.0624           | 2.200  |
| Fig. S2 | P12 USVs<br>Number of calls | <i>post hoc</i> t-test with<br>Bonferroni correction | WT vs. Pmut – Male   | 0.5175           | 1.139  |
|         |                             |                                                      | WT vs. Pmut – Female | 0.0730           | 2.132  |
| Fig. S2 | P16 USVs<br>Prin. frequency | <i>post hoc</i> t-test with<br>Bonferroni correction | WT vs. Pmut – Male   | 0.2313           | 1.593  |
|         |                             |                                                      | WT vs. Pmut – Female | 0.2605           | 1.531  |

**Supplementary Table S5.** Sex-specific *post hoc* comparisons following detection of a significant genotype-by-sex interaction in isolation-induced ultrasonic vocalization (USV) parameters in *Magel2<sup>Pmut</sup>* rats and wild-type controls (*post hoc* unpaired, two-tailed t-tests with Bonferroni correction).

| Figure  | Parameter                        | Sample size before outlier analysis |           |           |             | Outliers removed<br>(ROUT, Q = 1%) | Sample size after outlier analysis |           |           |             |
|---------|----------------------------------|-------------------------------------|-----------|-----------|-------------|------------------------------------|------------------------------------|-----------|-----------|-------------|
|         |                                  | WT male                             | WT female | Pmut male | Pmut female |                                    | WT male                            | WT female | Pmut male | Pmut female |
| Fig. 3a | EPM - Time in open arms          | 20                                  | 14        | 16        | 24          | 1                                  | 19                                 | 14        | 16        | 24          |
| Fig. 3b | EPM – Distance in open arms      | 20                                  | 14        | 16        | 24          | 3                                  | 18                                 | 13        | 16        | 24          |
| Fig. 3c | EPM - Number of open arms visits | 20                                  | 14        | 16        | 24          | 0                                  | 20                                 | 14        | 16        | 24          |
| Fig. 3d | EPM - Time in closed arms        | 20                                  | 14        | 16        | 24          | 0                                  | 20                                 | 14        | 16        | 24          |

**Supplementary Table S6.** Sample size before and after outlier analysis (ROUT, Q = 1%) for elevated plus maze (EPM) parameters in *Magel2<sup>Pmut</sup>* rats and wild-type controls of both sexes.

| Figure  | Parameter                        | Statistical test | Source of variation | P Value         | F (DFn, DFd)        |
|---------|----------------------------------|------------------|---------------------|-----------------|---------------------|
| Fig. 3a | EPM - Time in open arms          | two-way ANOVA    | Genotype            | <b>0.0048**</b> | F (1, 69) = 8.475   |
|         |                                  |                  | Sex                 | 0.5103          | F (1, 69) = 0.4380  |
|         |                                  |                  | Genotype x sex      | 0.8510          | F (1, 69) = 0.03555 |
| Fig. 3b | EPM - Distance in open arms      | two-way ANOVA    | Genotype            | <b>0.0013**</b> | F (1, 67) = 11.20   |
|         |                                  |                  | Sex                 | 0.6239          | F (1, 67) = 0.2427  |
|         |                                  |                  | Genotype x sex      | 0.8536          | F (1, 67) = 0.03430 |
| Fig. 3c | EPM – Number of open arms visits | two-way ANOVA    | Genotype            | <b>0.0230*</b>  | F (1, 70) = 5.402   |
|         |                                  |                  | Sex                 | 0.8750          | F (1, 70) = 0.02494 |
|         |                                  |                  | Genotype x sex      | 0.2682          | F (1, 70) = 1.246   |
| Fig. 3d | EPM - Time in closed arms        | two-way ANOVA    | Genotype            | <b>0.0443*</b>  | F (1, 70) = 4.195   |
|         |                                  |                  | Sex                 | 0.6699          | F (1, 70) = 0.1833  |
|         |                                  |                  | Genotype x sex      | 0.7244          | F (1, 70) = 0.1253  |

**Supplementary Table S7.** Statistical comparisons of elevated plus maze (EPM) parameters for effects of genotype, sex, and genotype-by-sex interaction in *Magel2<sup>Pmut</sup>* rats and wild-type controls (two-way ANOVA).

| Figure  | Parameter                    | Sample size before outlier analysis |           |           |             | Outliers removed (ROUT, Q = 1%) | Sample size after outlier analysis |           |           |             |
|---------|------------------------------|-------------------------------------|-----------|-----------|-------------|---------------------------------|------------------------------------|-----------|-----------|-------------|
|         |                              | WT male                             | WT female | Pmut male | Pmut female |                                 | WT male                            | WT female | Pmut male | Pmut female |
| Fig. S3 | OF – Total distance traveled | 20                                  | 14        | 16        | 24          | 0                               | 20                                 | 14        | 16        | 24          |
| Fig. S3 | OF – Time in center          | 20                                  | 14        | 16        | 24          | 6                               | 19                                 | 13        | 13        | 23          |
| Fig. S3 | OF – Distance in center      | 20                                  | 14        | 16        | 24          | 4                               | 20                                 | 13        | 13        | 24          |
| Fig. S3 | OF – Time in edges           | 20                                  | 14        | 16        | 24          | 0                               | 20                                 | 14        | 16        | 24          |

**Supplementary Table S8.** Sample size before and after outlier analysis (ROUT, Q = 1%) for open field (OF) parameters in *Mage12<sup>Pmut</sup>* rats and wild-type controls of both sexes.

| Figure  | Parameter                    | Statistical test | Source of variation | P Value | F (DFn, DFd)         |
|---------|------------------------------|------------------|---------------------|---------|----------------------|
| Fig. S3 | OF – Total distance traveled | two-way ANOVA    | Genotype            | 0.2722  | F (1, 70) = 1.225    |
|         |                              |                  | Sex                 | 0.5387  | F (1, 70) = 0.3817   |
|         |                              |                  | Genotype x sex      | 0.7319  | F (1, 70) = 0.1183   |
| Fig. S3 | OF – Time in center          | two-way ANOVA    | Genotype            | 0.5711  | F (1, 64) = 0.3242   |
|         |                              |                  | Sex                 | 0.2632  | F (1, 64) = 1.274    |
|         |                              |                  | Genotype x sex      | 0.3934  | F (1, 64) = 0.7384   |
| Fig. S3 | OF – Distance in center      | two-way ANOVA    | Genotype            | 0.9355  | F (1, 66) = 0.006601 |
|         |                              |                  | Sex                 | 0.8235  | F (1, 66) = 0.05016  |
|         |                              |                  | Genotype x sex      | 0.7032  | F (1, 66) = 0.1465   |
| Fig. S3 | OF – Time in edges           | two-way ANOVA    | Genotype            | 0.6418  | F (1, 70) = 0.2183   |
|         |                              |                  | Sex                 | 0.3569  | F (1, 70) = 0.8601   |
|         |                              |                  | Genotype x sex      | 0.1832  | F (1, 70) = 1.807    |

**Supplementary Table S9.** Statistical comparisons of open field (OF) parameters for effects of genotype, sex, and genotype-by-sex interaction in *Mage12<sup>Pmut</sup>* rats and wild-type controls (two-way ANOVA).

| Figure  | Parameter                 | Sample size before outlier analysis |           |           |             | Outliers removed<br>(ROUT, Q = 1%) | Sample size after outlier analysis |           |           |             |
|---------|---------------------------|-------------------------------------|-----------|-----------|-------------|------------------------------------|------------------------------------|-----------|-----------|-------------|
|         |                           | WT male                             | WT female | Pmut male | Pmut female |                                    | WT male                            | WT female | Pmut male | Pmut female |
| Fig. 4b | LABORAS Eating duration   | 16                                  | 13        | 14        | 16          | 1                                  | 16                                 | 13        | 13        | 16          |
| Fig. 4c | LABORAS Drinking duration | 16                                  | 13        | 14        | 16          | 0                                  | 16                                 | 13        | 14        | 16          |
| Fig. 4d | LABORAS Eating events     | 16                                  | 13        | 14        | 16          | 0                                  | 16                                 | 13        | 14        | 16          |
| Fig. 4e | LABORAS Drinking events   | 16                                  | 13        | 14        | 16          | 0                                  | 16                                 | 13        | 14        | 16          |
| Fig. 4f | LABORAS Weight change     | 16                                  | 13        | 14        | 16          | 3                                  | 16                                 | 13        | 12        | 15          |
| Fig. 4g | LABORAS Locom. duration   | 16                                  | 13        | 14        | 16          | 0                                  | 16                                 | 13        | 14        | 16          |
| Fig. 4h | LABORAS Immobil. duration | 16                                  | 13        | 14        | 16          | 0                                  | 16                                 | 13        | 14        | 16          |
| Fig. 4i | LABORAS Groom. duration   | 16                                  | 13        | 14        | 16          | 0                                  | 16                                 | 13        | 14        | 16          |
| Fig. S4 | LABORAS Locom. events     | 16                                  | 13        | 14        | 16          | 0                                  | 16                                 | 13        | 14        | 16          |
| Fig. S4 | LABORAS Immobil. events   | 16                                  | 13        | 14        | 16          | 0                                  | 16                                 | 13        | 14        | 16          |
| Fig. S4 | LABORAS Groom. events     | 16                                  | 13        | 14        | 16          | 0                                  | 16                                 | 13        | 14        | 16          |
| Fig. S4 | LABORAS Distance traveled | 16                                  | 13        | 14        | 16          | 0                                  | 16                                 | 13        | 14        | 16          |

**Supplementary Table S10.** Sample size before and after outlier analysis (ROUT, Q = 1%) for LABORAS home-cage monitoring parameters in *Mage12<sup>Pmut</sup>* rats and wild-type controls of both sexes. Note: One female *Mage12<sup>Pmut</sup>* animal was excluded from LABORAS due to not reaching the minimum required weight of 80g in time. Locom.: Locomotion; Immobil.: Immobility; Groom: Grooming.

| Figure  | Parameter                      | Statistical test | Source of variation | P Value          | F (DFn, DFd)         |
|---------|--------------------------------|------------------|---------------------|------------------|----------------------|
| Fig. 4b | LABORAS<br>Eating duration     | two-way ANOVA    | Genotype            | <b>0.0002***</b> | F (1, 54) = 16.54    |
|         |                                |                  | Sex                 | 0.5679           | F (1, 54) = 0.1609   |
|         |                                |                  | Genotype x sex      | 0.1609           | F (1, 54) = 2.021    |
| Fig. 4c | LABORAS<br>Drinking duration   | two-way ANOVA    | Genotype            | <b>0.0301*</b>   | F (1, 55) = 4.958    |
|         |                                |                  | Sex                 | 0.3838           | F (1, 55) = 0.7707   |
|         |                                |                  | Genotype x sex      | 0.8078           | F (1, 55) = 0.05976  |
| Fig. 4d | LABORAS<br>Eating events       | two-way ANOVA    | Genotype            | <b>0.0099**</b>  | F (1, 55) = 7.141    |
|         |                                |                  | Sex                 | 0.6256           | F (1, 55) = 0.2408   |
|         |                                |                  | Genotype x sex      | 0.5268           | F (1, 55) = 0.4057   |
| Fig. 4e | LABORAS<br>Drinking events     | two-way ANOVA    | Genotype            | <b>0.0187*</b>   | F (1, 55) = 5.869    |
|         |                                |                  | Sex                 | 0.3853           | F (1, 55) = 0.7659   |
|         |                                |                  | Genotype x sex      | 0.9077           | F (1, 55) = 0.01357  |
| Fig. 4f | LABORAS<br>Weight change       | two-way ANOVA    | Genotype            | 0.2127           | F (1, 52) = 1.592    |
|         |                                |                  | Sex                 | 0.2387           | F (1, 52) = 1.421    |
|         |                                |                  | Genotype x sex      | 0.3785           | F (1, 52) = 0.7888   |
| Fig. 4g | LABORAS<br>Locomotion duration | two-way ANOVA    | Genotype            | 0.3344           | F (1, 55) = 0.9485   |
|         |                                |                  | Sex                 | 0.0739           | F (1, 55) = 3.319    |
|         |                                |                  | Genotype x sex      | 0.3008           | F (1, 55) = 1.091    |
| Fig. 4h | LABORAS<br>Immobility duration | two-way ANOVA    | Genotype            | 0.2944           | F (1, 55) = 1.121    |
|         |                                |                  | Sex                 | 0.1574           | F (1, 55) = 2.055    |
|         |                                |                  | Genotype x sex      | 0.6963           | F (1, 55) = 0.1540   |
| Fig. 4i | LABORAS<br>Grooming duration   | two-way ANOVA    | Genotype            | 0.2811           | F (1, 55) = 1.185    |
|         |                                |                  | Sex                 | 0.3520           | F (1, 55) = 0.8812   |
|         |                                |                  | Genotype x sex      | 0.8311           | F (1, 55) = 0.04591  |
| Fig. S4 | LABORAS<br>Locomotion events   | two-way ANOVA    | Genotype            | 0.5807           | F (1, 55) = 0.3088   |
|         |                                |                  | Sex                 | 0.1597           | F (1, 55) = 2.032    |
|         |                                |                  | Genotype x sex      | 0.3004           | F (1, 55) = 1.093    |
| Fig. S4 | LABORAS<br>Immobility events   | two-way ANOVA    | Genotype            | 0.2734           | F (1, 55) = 1.224    |
|         |                                |                  | Sex                 | 0.9736           | F (1, 55) = 0.001106 |
|         |                                |                  | Genotype x sex      | 0.4746           | F (1, 55) = 0.5183   |
| Fig. S4 | LABORAS<br>Grooming evens      | two-way ANOVA    | Genotype            | 0.1779           | F (1, 55) = 1.862    |
|         |                                |                  | Sex                 | <b>0.0483*</b>   | F (1, 55) = 4.079    |
|         |                                |                  | Genotype x sex      | 0.3309           | F (1, 55) = 0.9624   |
| Fig. S4 | LABORAS<br>Distance traveled   | two-way ANOVA    | Genotype            | 0.1170           | F (1, 55) = 2.536    |
|         |                                |                  | Sex                 | 0.5736           | F (1, 55) = 0.3204   |
|         |                                |                  | Genotype x sex      | 0.5816           | F (1, 55) = 0.3072   |

**Supplementary Table S11.** Statistical comparisons of LABORAS home-cage monitoring parameters for effects of genotype, sex, and genotype-by-sex interaction in *Mage12<sup>Pmut</sup>* rats and wild-type controls (two-way ANOVA).

| Figure  | Parameter                      | Sample size before outlier analysis |           |           |             | Outliers removed<br>(ROUT, Q = 1%) | Sample size after outlier analysis |           |           |             |
|---------|--------------------------------|-------------------------------------|-----------|-----------|-------------|------------------------------------|------------------------------------|-----------|-----------|-------------|
|         |                                | WT male                             | WT female | Pmut male | Pmut female |                                    | WT male                            | WT female | Pmut male | Pmut female |
| Fig. 5c | CatWalk XT<br>Run avg. speed   | 16                                  | 13        | 14        | 17          | 0                                  | 16                                 | 13        | 14        | 17          |
| Fig. 5d | CatWalk XT<br>Number of steps  | 16                                  | 13        | 14        | 17          | 1                                  | 16                                 | 13        | 13        | 17          |
| Fig. 5e | CatWalk XT<br>Num. of patterns | 16                                  | 13        | 14        | 17          | 0                                  | 16                                 | 13        | 14        | 17          |
| Fig. 5f | CatWalk XT<br>Stride length    | 16                                  | 13        | 14        | 17          | 0                                  | 16                                 | 13        | 14        | 17          |
| Fig. 5g | CatWalk XT<br>Paw print area   | 16                                  | 13        | 14        | 17          | 1                                  | 16                                 | 13        | 14        | 16          |
| Fig. 5h | CatWalk XT<br>Paw print length | 16                                  | 13        | 14        | 17          | 2                                  | 16                                 | 12        | 14        | 16          |
| Fig. 5i | CatWalk XT<br>Swing speed      | 16                                  | 13        | 14        | 17          | 0                                  | 16                                 | 13        | 14        | 17          |
| Fig. 5j | CatWalk XT<br>Regularity index | 16                                  | 13        | 14        | 17          | 0                                  | 16                                 | 13        | 14        | 17          |
| Fig. S5 | CatWalk XT<br>Support single   | 16                                  | 13        | 14        | 17          | 5                                  | 14                                 | 13        | 13        | 15          |
| Fig. S5 | CatWalk XT<br>Support diagonal | 16                                  | 13        | 14        | 17          | 0                                  | 16                                 | 13        | 14        | 17          |
| Fig. S5 | CatWalk XT<br>Support lateral  | 16                                  | 13        | 14        | 17          | 0                                  | 16                                 | 13        | 14        | 17          |
| Fig. S5 | CatWalk XT<br>Support three    | 16                                  | 13        | 14        | 17          | 0                                  | 16                                 | 13        | 14        | 17          |
| Fig. S5 | CatWalk XT<br>Support four     | 16                                  | 13        | 14        | 17          | 3                                  | 16                                 | 12        | 13        | 16          |
| Fig. S5 | CatWalk XT<br>Run duration     | 16                                  | 13        | 14        | 17          | 1                                  | 16                                 | 13        | 13        | 17          |
| Fig. S5 | CatWalk XT<br>Paw print width  | 16                                  | 13        | 14        | 17          | 0                                  | 16                                 | 13        | 14        | 17          |
| Fig. S5 | CatWalk XT<br>Stand time       | 16                                  | 13        | 14        | 17          | 1                                  | 16                                 | 12        | 13        | 17          |
| Fig. S5 | CatWalk XT<br>Swing time       | 16                                  | 13        | 14        | 17          | 0                                  | 16                                 | 13        | 14        | 17          |
| Fig. S5 | CatWalk XT<br>Cadence          | 16                                  | 13        | 14        | 17          | 0                                  | 16                                 | 13        | 14        | 17          |
| Fig. S5 | CatWalk XT<br>Front paw width  | 16                                  | 13        | 14        | 17          | 0                                  | 16                                 | 13        | 14        | 17          |
| Fig. S5 | CatWalk XT<br>Hind paw width   | 16                                  | 13        | 14        | 17          | 0                                  | 16                                 | 13        | 14        | 17          |

**Supplementary Table S12.** Sample size before and after outlier analysis (ROUT, Q = 1%) for CatWalk XT parameters in *Mage12<sup>Pmut</sup>* rats and wild-type controls of both sexes. avg.: average.

| Figure  | Parameter                      | Statistical test | Source of variation | P Value               | F (DFn, DFd)        |
|---------|--------------------------------|------------------|---------------------|-----------------------|---------------------|
| Fig. 5c | CatWalk XT<br>Run avg. speed   | two-way ANOVA    | Genotype            | 0.3584                | F (1, 56) = 0.8575  |
|         |                                |                  | Sex                 | 0.2248                | F (1, 56) = 1.507   |
|         |                                |                  | Genotype x sex      | 0.3219                | F (1, 56) = 0.9990  |
| Fig. 5d | CatWalk XT<br>Number of steps  | two-way ANOVA    | Genotype            | <b>0.0041**</b>       | F (1, 55) = 8.989   |
|         |                                |                  | Sex                 | 0.8965                | F (1, 55) = 0.01708 |
|         |                                |                  | Genotype x sex      | 0.0805                | F (1, 55) = 3.172   |
| Fig. 5e | CatWalk XT<br>Num. of patterns | two-way ANOVA    | Genotype            | <b>0.0091**</b>       | F (1, 56) = 7.297   |
|         |                                |                  | Sex                 | 0.5618                | F (1, 56) = 0.3406  |
|         |                                |                  | Genotype x sex      | 0.1353                | F (1, 56) = 2.296   |
| Fig. 5f | CatWalk XT<br>Stride length    | two-way ANOVA    | Genotype            | <b>0.0038**</b>       | F (1, 56) = 9.125   |
|         |                                |                  | Sex                 | 0.6128                | F (1, 56) = 0.2591  |
|         |                                |                  | Genotype x sex      | 0.0640                | F (1, 56) = 3.569   |
| Fig. 5g | CatWalk XT<br>Paw print area   | two-way ANOVA    | Genotype            | <b>&lt;0.0001****</b> | F (1, 55) = 22.22   |
|         |                                |                  | Sex                 | <b>0.003***</b>       | F (1, 55) = 14.76   |
|         |                                |                  | Genotype x sex      | 0.7426                | F (1, 55) = 0.7426  |
| Fig. 5h | CatWalk XT<br>Paw print length | two-way ANOVA    | Genotype            | <b>0.0001***</b>      | F (1, 54) = 17.27   |
|         |                                |                  | Sex                 | <b>0.0016**</b>       | F (1, 54) = 11.05   |
|         |                                |                  | Genotype x sex      | 0.5205                | F (1, 54) = 0.4183  |
| Fig. 5i | CatWalk XT<br>Swing speed      | two-way ANOVA    | Genotype            | <b>0.0342*</b>        | F (1, 56) = 4.715   |
|         |                                |                  | Sex                 | 0.7782                | F (1, 56) = 0.08009 |
|         |                                |                  | Genotype x sex      | 0.3601                | F (1, 56) = 0.8515  |
| Fig. 5j | CatWalk XT<br>Regularity index | two-way ANOVA    | Genotype            | <b>0.0069**</b>       | F (1, 56) = 7.876   |
|         |                                |                  | Sex                 | 0.5710                | F (1, 56) = 0.3249  |
|         |                                |                  | Genotype x sex      | <b>0.0278*</b>        | F (1, 56) = 5.100   |
| Fig. S5 | CatWalk XT<br>Support single   | two-way ANOVA    | Genotype            | 0.4015                | F (1, 51) = 0.7157  |
|         |                                |                  | Sex                 | <b>0.0031**</b>       | F (1, 51) = 9.609   |
|         |                                |                  | Genotype x sex      | 0.4681                | F (1, 51) = 0.5345  |
| Fig. S5 | CatWalk XT<br>Support diagonal | two-way ANOVA    | Genotype            | 0.9091                | F (1, 56) = 0.01315 |
|         |                                |                  | Sex                 | 0.3919                | F (1, 56) = 0.7445  |
|         |                                |                  | Genotype x sex      | 0.2360                | F (1, 56) = 1.435   |
| Fig. S5 | CatWalk XT<br>Support lateral  | two-way ANOVA    | Genotype            | 0.5969                | F (1, 56) = 0.2830  |
|         |                                |                  | Sex                 | <b>0.0187*</b>        | F (1, 56) = 5.863   |
|         |                                |                  | Genotype x sex      | 0.1380                | F (1, 56) = 2.264   |
| Fig. S5 | CatWalk XT<br>Support three    | two-way ANOVA    | Genotype            | 0.7085                | F (1, 56) = 0.1413  |
|         |                                |                  | Sex                 | 0.2243                | F (1, 56) = 1.510   |
|         |                                |                  | Genotype x sex      | 0.2863                | F (1, 56) = 1.159   |
| Fig. S5 | CatWalk XT<br>Support four     | two-way ANOVA    | Genotype            | 0.0744                | F (1, 53) = 3.312   |
|         |                                |                  | Sex                 | 0.0887                | F (1, 53) = 3.007   |
|         |                                |                  | Genotype x sex      | 0.4816                | F (1, 53) = 0.5022  |
| Fig. S5 | CatWalk XT<br>Run duration     | two-way ANOVA    | Genotype            | 0.4043                | F (1, 55) = 0.7064  |
|         |                                |                  | Sex                 | 0.0966                | F (1, 55) = 2.857   |
|         |                                |                  | Genotype x sex      | 0.7813                | F (1, 55) = 0.07785 |
| Fig. S5 | CatWalk XT<br>Paw print width  | two-way ANOVA    | Genotype            | <b>&lt;0.0001****</b> | F (1, 56) = 21.61   |
|         |                                |                  | Sex                 | <b>0.0011**</b>       | F (1, 56) = 11.83   |
|         |                                |                  | Genotype x sex      | 0.9152                | F (1, 56) = 0.01144 |
| Fig. S5 | CatWalk XT<br>Stand time       | two-way ANOVA    | Genotype            | 0.7564                | F (1, 55) = 0.09724 |
|         |                                |                  | Sex                 | 0.0666                | F (1, 55) = 3.501   |
|         |                                |                  | Genotype x sex      | 0.2880                | F (1, 55) = 1.151   |
| Fig. S5 | CatWalk XT<br>Swing time       | two-way ANOVA    | Genotype            | 0.3269                | F (1, 56) = 0.9782  |
|         |                                |                  | Sex                 | 0.3987                | F (1, 56) = 0.7231  |
|         |                                |                  | Genotype x sex      | 0.4893                | F (1, 56) = 0.4845  |
| Fig. S5 | CatWalk XT<br>Cadence          | two-way ANOVA    | Genotype            | 0.8058                | F (1, 56) = 0.06099 |
|         |                                |                  | Sex                 | 0.2923                | F (1, 56) = 1.130   |
|         |                                |                  | Genotype x sex      | 0.2388                | F (1, 56) = 1.418   |
| Fig. S5 | CatWalk XT<br>Front paw width  | two-way ANOVA    | Genotype            | 0.6111                | F (1, 56) = 0.2615  |
|         |                                |                  | Sex                 | 0.5691                | F (1, 56) = 0.3281  |
|         |                                |                  | Genotype x sex      | 0.8609                | F (1, 56) = 0.03100 |

|         |                              |               |                |                 |                   |
|---------|------------------------------|---------------|----------------|-----------------|-------------------|
| Fig. S5 | CatWalk XT<br>Hind paw width | two-way ANOVA | Genotype       | <b>0.0025**</b> | F (1, 56) = 10.02 |
|         |                              |               | Sex            | <b>0.0086**</b> | F (1, 56) = 7.414 |
|         |                              |               | Genotype x sex | <b>0.0102*</b>  | F (1, 56) = 7.061 |

**Supplementary Table S13.** Statistical comparisons of CatWalk XT parameters for effects of genotype, sex, and genotype-by-sex interaction in *Mage12<sup>Pmut</sup>* rats and wild-type controls (two-way ANOVA). avg.: average.

| Figure  | Parameter                     | Statistical test                                     | Comparison           | Adjusted P Value | t      |
|---------|-------------------------------|------------------------------------------------------|----------------------|------------------|--------|
| Fig. 5j | CatWalkXT<br>Regularity index | <i>post hoc</i> t-test with<br>Bonferroni correction | WT vs. Pmut – Male   | <b>0.0014**</b>  | 3.593  |
|         |                               |                                                      | WT vs. Pmut – Female | >0.9999          | 0.3863 |
| Fig. S5 | CatWalkXT<br>BOS hind paws    | <i>post hoc</i> t-test with<br>Bonferroni correction | WT vs. Pmut – Male   | >0.9999          | 0.3601 |
|         |                               |                                                      | WT vs. Pmut – Female | <b>0.0003***</b> | 4.103  |

**Supplementary Table S14.** Sex-specific *post hoc* comparisons following detection of a significant genotype-by-sex interaction in CatWalk XT parameters in *Mage12<sup>Pmut</sup>* rats and wild-type controls (*post hoc* unpaired, two-tailed t-tests with Bonferroni correction).

| Figure  | Parameter                  | Sample size before outlier analysis |           |           |             | Outliers removed<br>(ROUT, Q = 1%) | Sample size after outlier analysis |           |           |             |
|---------|----------------------------|-------------------------------------|-----------|-----------|-------------|------------------------------------|------------------------------------|-----------|-----------|-------------|
|         |                            | WT male                             | WT female | Pmut male | Pmut female |                                    | WT male                            | WT female | Pmut male | Pmut female |
| Fig. 6a | T-maze<br>Alternation rate | 16                                  | 13        | 14        | 17          | 0                                  | 16                                 | 13        | 14        | 17          |
| Fig. 6b | T-maze<br>Completion rate  | 16                                  | 13        | 14        | 17          | 1                                  | 16                                 | 12        | 14        | 17          |
| Fig. 6c | T-maze<br>Decision time    | 16                                  | 13        | 14        | 17          | 0                                  | 16                                 | 13        | 14        | 17          |

**Supplementary Table S15.** Sample size before and after outlier analysis (ROUT, Q = 1%) for spontaneous alternation T-maze parameters in *Mage12<sup>Pmut</sup>* rats and wild-type controls of both sexes.

| Figure  | Parameter                  | Statistical test | Source of variation | P Value         | F (DFn, DFd)         |
|---------|----------------------------|------------------|---------------------|-----------------|----------------------|
| Fig. 6a | T-maze<br>Alternation rate | two-way ANOVA    | Genotype            | 0.6150          | F (1, 56) = 0.2559   |
|         |                            |                  | Sex                 | 0.4715          | F (1, 56) = 0.5256   |
|         |                            |                  | Genotype x sex      | 0.4051          | F (1, 56) = 0.7037   |
| Fig. 6b | T-maze<br>Completion rate  | two-way ANOVA    | Genotype            | 0.6438          | F (1, 55) = 0.2162   |
|         |                            |                  | Sex                 | 0.1829          | F (1, 55) = 1.819    |
|         |                            |                  | Genotype x sex      | 0.3319          | F (1, 55) = 0.3319   |
| Fig. 6c | T-maze<br>Decision time    | two-way ANOVA    | Genotype            | <b>0.0063**</b> | F (1, 56) = 8.055    |
|         |                            |                  | Sex                 | 0.8710          | F (1, 56) = 0.02661  |
|         |                            |                  | Genotype x sex      | 0.9464          | F (1, 56) = 0.004564 |

**Supplementary Table S16.** Statistical comparisons of spontaneous alternation T-maze parameters for effects of genotype, sex, and genotype-by-sex interaction in *Mage12<sup>Pmut</sup>* rats and wild-type controls (two-way ANOVA).

| Figure  | Parameter                              | Sample size before outlier analysis |           |           |             | Outliers removed (ROUT, Q = 1%) | Sample size after outlier analysis |           |           |             |
|---------|----------------------------------------|-------------------------------------|-----------|-----------|-------------|---------------------------------|------------------------------------|-----------|-----------|-------------|
|         |                                        | WT male                             | WT female | Pmut male | Pmut female |                                 | WT male                            | WT female | Pmut male | Pmut female |
| Fig. S6 | TCT – Sociability Time in prox. of S1  | 16                                  | 13        | 14        | 17          | 0                               | 16                                 | 13        | 14        | 17          |
| Fig. S6 | TCT – Sociability Time in prox. of E   | 16                                  | 13        | 14        | 17          | 1                               | 16                                 | 12        | 14        | 17          |
| Fig. S6 | TCT – Sociability Sociability index    | 16                                  | 13        | 14        | 17          | 2                               | 15                                 | 13        | 14        | 16          |
| Fig. S6 | TCT – Soc. novelty Time in prox. of S1 | 16                                  | 13        | 14        | 17          | 0                               | 16                                 | 13        | 14        | 17          |
| Fig. S6 | TCT – Soc. novelty Time in prox. of S2 | 16                                  | 13        | 14        | 17          | 0                               | 16                                 | 13        | 14        | 17          |
| Fig. S6 | TCT – Soc. novelty Soc. novelty index  | 16                                  | 13        | 14        | 17          | 0                               | 16                                 | 13        | 14        | 17          |

**Supplementary Table S17.** Sample size before and after outlier analysis (ROUT, Q = 1%) for three-chamber social interaction test (TCT) parameters in *Magel2*<sup>Pmut</sup> rats and wild-type controls of both sexes. S1: Stranger 1; E: Empty cup; S2: Stranger 2.

| Figure  | Parameter                            | Statistical test | Source of variation | P Value | F (DFn, DFd)         |
|---------|--------------------------------------|------------------|---------------------|---------|----------------------|
| Fig. S6 | TCT Sociability: Time in prox. of S1 | two-way ANOVA    | Genotype            | 0.7611  | F (1, 56) = 0.09333  |
|         |                                      |                  | Sex                 | 0.2513  | F (1, 56) = 1.344    |
|         |                                      |                  | Genotype x sex      | 0.1142  | F (1, 56) = 2.575    |
| Fig. S6 | TCT Sociability: Time in prox. of E  | two-way ANOVA    | Genotype            | 0.7722  | F (1, 55) = 0.08465  |
|         |                                      |                  | Sex                 | 0.1133  | F (1, 55) = 2.589    |
|         |                                      |                  | Genotype x sex      | 0.7757  | F (1, 55) = 0.08202  |
| Fig. S6 | TCT – Sociability: Sociability index | two-way ANOVA    | Genotype            | 0.2752  | F (1, 54) = 1.215    |
|         |                                      |                  | Sex                 | 0.3963  | F (1, 54) = 0.7312   |
|         |                                      |                  | Genotype x sex      | 0.2564  | F (1, 54) = 1.316    |
| Fig. S6 | TCT Soc. nov.: Time in prox. of S1   | two-way ANOVA    | Genotype            | 0.2805  | F (1, 56) = 1.188    |
|         |                                      |                  | Sex                 | 0.9279  | F (1, 56) = 0.008258 |
|         |                                      |                  | Genotype x sex      | 0.5845  | F (1, 56) = 0.3025   |
| Fig. S6 | TCT Soc. nov.: Time in prox. of S2   | two-way ANOVA    | Genotype            | 0.9920  | F (1, 56) = 0.000102 |
|         |                                      |                  | Sex                 | 0.3988  | F (1, 56) = 0.7230   |
|         |                                      |                  | Genotype x sex      | 0.3000  | F (1, 56) = 1.095    |
| Fig. S6 | TCT Soc. nov.: Soc. nov. index       | two-way ANOVA    | Genotype            | 0.9785  | F (1, 56) = 0.000734 |
|         |                                      |                  | Sex                 | 0.4352  | F (1, 56) = 0.6177   |
|         |                                      |                  | Genotype x sex      | 0.4513  | F (1, 56) = 0.5754   |

**Supplementary Table S18.** Statistical comparisons of the three-chamber social interaction test (TCT) parameters for effects of genotype, sex, and genotype-by-sex interaction in *Magel2*<sup>Pmut</sup> rats and wild-type controls (two-way ANOVA). S1: Stranger 1; E: Empty cup; S2: Stranger 2.

| Figure  | Parameter                           | Sample size before outlier analysis |           |           |             | Outliers removed<br>(ROUT, Q = 1%) | Sample size after outlier analysis |           |           |             |
|---------|-------------------------------------|-------------------------------------|-----------|-----------|-------------|------------------------------------|------------------------------------|-----------|-----------|-------------|
|         |                                     | WT male                             | WT female | Pmut male | Pmut female |                                    | WT male                            | WT female | Pmut male | Pmut female |
| Fig. 7b | DSI – Social behaviors duration     | 14                                  | 13        | 14        | 17          | 0                                  | 14                                 | 13        | 14        | 17          |
| Fig. 7c | DSI – Non-social behaviors duration | 14                                  | 13        | 14        | 17          | 1                                  | 14                                 | 13        | 14        | 16          |
| Fig. 7d | DSI – Crawling duration             | 14                                  | 13        | 14        | 17          | 1                                  | 14                                 | 13        | 13        | 17          |
| Fig. 7e | DSI – Body sniffing duration        | 14                                  | 13        | 14        | 17          | 0                                  | 14                                 | 13        | 14        | 17          |
| Fig. 7f | DSI – Nose-to-nose cont. duration   | 14                                  | 13        | 14        | 17          | 3                                  | 14                                 | 12        | 12        | 17          |
| Fig. 7g | DSI – Rearing duration              | 14                                  | 13        | 14        | 17          | 5                                  | 12                                 | 12        | 13        | 16          |
| Fig. 7h | DSI – Play behaviors duration       | 14                                  | 13        | 14        | 17          | 0                                  | 14                                 | 13        | 14        | 17          |
| Fig. 7i | DSI – Following duration            | 14                                  | 13        | 14        | 17          | 0                                  | 14                                 | 13        | 14        | 17          |
| Fig. 7j | DSI – Anogenital sniffing duration  | 14                                  | 13        | 14        | 17          | 0                                  | 14                                 | 13        | 14        | 16          |
| Fig. 7k | DSI – Self-grooming duration        | 14                                  | 13        | 14        | 17          | 1                                  | 14                                 | 13        | 14        | 16          |

**Supplementary Table S19.** Sample size before and after outlier analysis (ROUT, Q = 1%) for direct social interaction (DSI) test parameters in *Mage12<sup>Pmut</sup>* rats and wild-type controls of both sexes. Note: Two male *Mage12<sup>Pmut</sup>* animals were excluded from video analysis due to technical problems.

| Figure  | Parameter                           | Statistical test | Source of variation | P Value               | F (DFn, DFd)        |
|---------|-------------------------------------|------------------|---------------------|-----------------------|---------------------|
| Fig. 7b | DSI – Social behaviors duration     | two-way ANOVA    | Genotype            | 0.0987                | F (1, 54) = 2.823   |
|         |                                     |                  | Sex                 | 0.4783                | F (1, 54) = 0.5098  |
|         |                                     |                  | Genotype x sex      | 0.8478                | F (1, 54) = 0.03721 |
| Fig. 7c | DSI – Non-social behaviors duration | two-way ANOVA    | Genotype            | 0.1506                | F (1, 53) = 2.127   |
|         |                                     |                  | Sex                 | 0.6645                | F (1, 53) = 0.1902  |
|         |                                     |                  | Genotype x sex      | 0.5058                | F (1, 53) = 0.4489  |
| Fig. 7d | DSI – Crawling duration             | two-way ANOVA    | Genotype            | <b>&lt;0.0001****</b> | F (1, 53) = 18.46   |
|         |                                     |                  | Sex                 | <b>0.0117*</b>        | F (1, 53) = 6.823   |
|         |                                     |                  | Genotype x sex      | 0.4991                | F (1, 53) = 0.4633  |
| Fig. 7e | DSI – Body sniffing duration        | two-way ANOVA    | Genotype            | <b>0.0473*</b>        | F (1, 54) = 0.0473  |
|         |                                     |                  | Sex                 | 0.5671                | F (1, 54) = 0.5671  |
|         |                                     |                  | Genotype x sex      | 0.1062                | F (1, 54) = 0.1062  |
| Fig. 7f | DSI – Nose-to-nose contact duration | two-way ANOVA    | Genotype            | <b>0.0004***</b>      | F (1, 51) = 14.49   |
|         |                                     |                  | Sex                 | <b>0.0005***</b>      | F (1, 51) = 14.02   |
|         |                                     |                  | Genotype x sex      | <b>0.0008***</b>      | F (1, 51) = 12.63   |
| Fig. 7g | DSI – Rearing duration              | two-way ANOVA    | Genotype            | <b>&lt;0.0001****</b> | F (1, 49) = 19.68   |
|         |                                     |                  | Sex                 | 0.1759                | F (1, 49) = 1.886   |
|         |                                     |                  | Genotype x sex      | 0.5585                | F (1, 49) = 0.3470  |
| Fig. 7h | DSI – Play behaviors duration       | two-way ANOVA    | Genotype            | 0.5041                | F (1, 54) = 0.4522  |
|         |                                     |                  | Sex                 | <b>0.0395*</b>        | F (1, 54) = 4.450   |
|         |                                     |                  | Genotype x sex      | 0.5874                | F (1, 54) = 0.2980  |
| Fig. 7i | DSI – Following duration            | two-way ANOVA    | Genotype            | 0.6012                | F (1, 54) = 0.2765  |
|         |                                     |                  | Sex                 | 0.3069                | F (1, 54) = 1.064   |
|         |                                     |                  | Genotype x sex      | 0.2882                | F (1, 54) = 1.151   |
| Fig. 7j | DSI – Anogenital sniffing duration  | two-way ANOVA    | Genotype            | 0.8292                | F (1, 54) = 0.04699 |
|         |                                     |                  | Sex                 | 0.0542                | F (1, 54) = 3.872   |
|         |                                     |                  | Genotype x sex      | 0.6978                | F (1, 54) = 0.1523  |
| Fig. 7k | DSI – Self-grooming duration        | two-way ANOVA    | Genotype            | 0.0958                | F (1, 53) = 2.876   |
|         |                                     |                  | Sex                 | 0.8833                | F (1, 53) = 0.02176 |
|         |                                     |                  | Genotype x sex      | 0.2195                | F (1, 53) = 1.544   |

**Supplementary Table S20.** Statistical comparisons direct social interaction (DSI) test parameters for effects of genotype, sex, and genotype-by-sex interaction in *Mage12<sup>Pmut</sup>* rats and wild-type controls (two-way ANOVA).

| Figure  | Parameter                           | Statistical test                                  | Comparison           | Adjusted P Value      | t      |
|---------|-------------------------------------|---------------------------------------------------|----------------------|-----------------------|--------|
| Fig. 7f | DSI – Nose-to-nose contact duration | <i>post hoc</i> t-test with Bonferroni correction | WT vs. Pmut - Male   | 0.9891                | 0.1785 |
|         |                                     |                                                   | WT vs. Pmut – Female | <b>&lt;0.0001****</b> | 5.193  |

**Supplementary Table S21.** Sex-specific *post hoc* comparisons following detection of a significant genotype-by-sex interaction in direct social interaction (DSI) parameters in *Mage12<sup>Pmut</sup>* rats and wild-type controls (*post hoc* unpaired, two-tailed t-tests with Bonferroni correction).

| Figure  | Parameter                          | Sample size before outlier analysis |                |                |                  | Outliers removed (ROUT, Q = 1%) | Sample size after outlier analysis |           |           |             |
|---------|------------------------------------|-------------------------------------|----------------|----------------|------------------|---------------------------------|------------------------------------|-----------|-----------|-------------|
|         |                                    | WT & WT male                        | WT & WT female | Pmut & WT male | Pmut & WT female |                                 | WT male                            | WT female | Pmut male | Pmut female |
| Fig. S7 | 50-kHz USVs<br>Number of calls     | 15                                  | 13             | 14             | 17               | 0                               | 15                                 | 13        | 14        | 17          |
| Fig. S7 | 50-kHz USVs<br>Call length         | 15                                  | 13             | 14             | 17               | 0                               | 15                                 | 13        | 14        | 17          |
| Fig. S7 | 50-kHz USVs<br>Principal frequency | 15                                  | 13             | 14             | 17               | 0                               | 15                                 | 13        | 14        | 17          |
| Fig. S7 | 50-kHz USVs<br>Sinuosity           | 15                                  | 13             | 14             | 17               | 0                               | 15                                 | 13        | 14        | 17          |

**Supplementary Table S22.** Sample size before and after outlier analysis (ROUT, Q = 1%) for 50-kHz USVs during social interaction of *Mage12<sup>Pmut</sup>* rats and wild-type controls with a wild-type stimulus rat. Note: Since USV recordings always included the calls emitted by the wild-type stimulus rats, it was not possible to assign USVs to specific animals. Therefore, recordings were performed and compared in a pairwise manner with the respective wild-type stimulus rat (WT & WT or Pmut & WT). One male *Mage12<sup>Pmut</sup>* and wild-type pairing was excluded from the USV analysis due to technical problems.

| Figure  | Parameter                          | Statistical test | Source of variation | P Value               | F (DFn, DFd)       |
|---------|------------------------------------|------------------|---------------------|-----------------------|--------------------|
| Fig. S7 | 50-kHz USVs<br>Number of calls     | two-way ANOVA    | Genotype            | 0.0586                | F (1, 55) = 3.729  |
|         |                                    |                  | Sex                 | <b>0.0272*</b>        | F (1, 55) = 5.148  |
|         |                                    |                  | Genotype x sex      | 0.6070                | F (1, 55) = 0.2676 |
| Fig. S7 | 50-kHz USVs<br>Call length         | two-way ANOVA    | Genotype            | 0.7509                | F (1, 55) = 0.1018 |
|         |                                    |                  | Sex                 | 0.1132                | F (1, 55) = 2.591  |
|         |                                    |                  | Genotype x sex      | 0.3538                | F (1, 55) = 0.8744 |
| Fig. S7 | 50-kHz USVs<br>Principal frequency | two-way ANOVA    | Genotype            | 0.0783                | F (1, 55) = 3.218  |
|         |                                    |                  | Sex                 | 0.1473                | F (1, 55) = 2.160  |
|         |                                    |                  | Genotype x sex      | 0.4865                | F (1, 55) = 0.4909 |
| Fig. S7 | 50-kHz USVs<br>Sinuosity           | two-way ANOVA    | Genotype            | 0.7137                | F (1, 55) = 0.1360 |
|         |                                    |                  | Sex                 | <b>&lt;0.0001****</b> | F (1, 55) = 19.53  |
|         |                                    |                  | Genotype x sex      | 0.6528                | F (1, 55) = 0.2046 |

**Supplementary Table S23.** Statistical comparisons of 50-kHz USVs during social interaction of *Mage12<sup>Pmut</sup>* rats and wild-type controls with a wild-type stimulus rat for effects of genotype, sex, and genotype-by-sex interaction (two-way ANOVA).
